# Supplementary material for: Representing improved tropospheric ozone distribution over the Northern Hemisphere by including lightning NO x emissions in CHIMERE
Source: Copernicus journal article supplement (doi:10.5194/acp-25-6273-2025), 2025-06-26
Supplement: Supplementary file 1 [file acp-25-6273-2025-supplement.pdf]

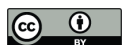

*Supplement of*

**Representing improved tropospheric ozone distribution  
over the Northern Hemisphere by including lightning  
NO<sub>x</sub> emissions in CHIMERE**

**Sanhita Ghosh et al.**

*Correspondence to:* Sanhita Ghosh ([ghosh.sanhita@lmd.ipsl.fr](mailto:ghosh.sanhita@lmd.ipsl.fr), [sanhitaghosh027@gmail.com](mailto:sanhitaghosh027@gmail.com))

The copyright of individual parts of the supplement might differ from the article licence.

**Table S1.** Zonally averaged tropopause height and cloud top height in model averaged across three latitude bands over the NH. The model top height is 12.03 km.

| Latitude band          | 0°–30° N | 30° N–60° N | 60° N–90° N |
|------------------------|----------|-------------|-------------|
| Tropopause height (km) | 15.6     | 11.3        | 10.5        |
| Cloud top height (km)  | 11.6     | 10.7        | 9.1         |

**Table S2.** Annual mean O<sub>3</sub> from LNOx-CTH and LNOx-ICEFLUX, and percentage changes in O<sub>3</sub>.  $\Delta O_3$  represents changes in O<sub>3</sub> from experiment LNOx-CTH with respect to that from experiment noLNOx; positive and negative values represent the increase and decrease in O<sub>3</sub> mixing ratio, respectively.

| Latitude band       | 0°–30° N                                                                | 30° N–60° N | 60° N–90° N | 0°–30° N                                                                           | 30° N–60° N  | 60° N–90° N  |
|---------------------|-------------------------------------------------------------------------|-------------|-------------|------------------------------------------------------------------------------------|--------------|--------------|
| Altitude band (hPa) | annual mean O <sub>3</sub> from LNOx-CTH in ppbv ( $\Delta O_3^*$ in %) |             |             | annual mean O <sub>3</sub> from LNOx-ICEFLUX in ppbv (LNOx-ICEFLUX – LNOx-CTH (%)) |              |              |
| 500–200             | 53.2 (10.7)                                                             | 92.1 (3.89) | 96.4 (2.05) | 55.96 (5.25)                                                                       | 94.49 (2.63) | 97.85 (1.49) |
| 750–500             | 42.7 (19.2)                                                             | 58.1 (5.80) | 45.7 (1.9)  | 45.97 (7.59)                                                                       | 60.12 (3.52) | 46.48 (1.73) |
| 900–750             | 35.3 (12.1)                                                             | 47.2 (3.07) | 37.3 (0.77) | 37.42 (5.84)                                                                       | 48.4 (2.58)  | 37.29 (1.05) |
| 998–900             | 32.4 (6.4)                                                              | 41.0 (1.13) | 31.8 (0.51) | 33.80 (4.16)                                                                       | 41.83 (1.92) | 32.07 (0.84) |

**Table S3.** Evaluation of simulated O<sub>3</sub> from experiments noLNOx, LNOx-CTH and LNOx-ICEFLUX with respect to observed data from WOUDC ozone sonde

| Latitude band       | 0°–30° N                                                                 | 30° N–60° N | 60° N–90° N | 0°–30° N                                                                    | 30° N–60° N  | 60° N–90° N | 0°–30° N                                                                        | 30° N–60° N   | 60° N–90° N |
|---------------------|--------------------------------------------------------------------------|-------------|-------------|-----------------------------------------------------------------------------|--------------|-------------|---------------------------------------------------------------------------------|---------------|-------------|
| Altitude band (hPa) | mean absolute bias in ppbv in simulated O <sub>3</sub> from expt. noLNOx |             |             | mean absolute bias in ppbv in simulated O <sub>3</sub> from expt. LNOx-CTH* |              |             | mean absolute bias in ppbv in simulated O <sub>3</sub> from expt. LNOx-ICEFLUX* |               |             |
| 500–200             | –4.5                                                                     | –41.3       | –44.6       | <b>0.63</b>                                                                 | <b>–37.8</b> | –42.5       | <b>3.42</b>                                                                     | <b>–35.43</b> | –42.3       |
| 750–500             | –5.6                                                                     | –0.2        | –2.5        | <b>1.2</b>                                                                  | 2.9          | –1.7        | <b>4.47</b>                                                                     | 5.00          | –0.91       |
| 900–750             | –5.4                                                                     | –1.3        | –1.4        | <b>–1.6</b>                                                                 | 0.1          | –1.1        | <b>0.46</b>                                                                     | 1.31          | –0.73       |
| 998–900             | 3.4                                                                      | 4.3         | 6.4         | 5.4                                                                         | 4.7          | 6.6         | 6.75                                                                            | 5.56          | 6.86        |

\*Reduction in absolute biases in the experiment 'LNOx-CTH' and 'LNOx-ICEFLUX' w.r.t. 'noLNOx' (i)  $\geq 3$  ppbv and  $\leq 6$  ppbv: bold; (ii)  $\geq 6$  ppbv: bold, italics; positive and negative values of absolute bias show that the simulated O<sub>3</sub> is higher and lower than the measurements, respectively.

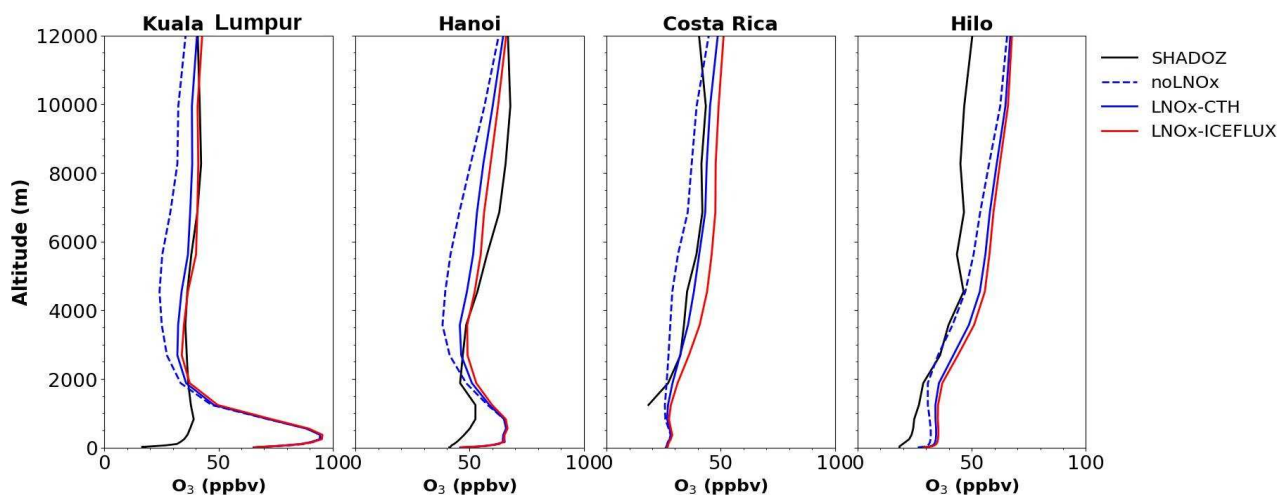

**Figure S1.** Vertical profile of annual mean of  $O_3$  mixing ratio from noLNOx (blue dashed line), LNOx-CTH (blue solid line) and LNOx-ICEFLUX (red solid line) simulations and comparison with the ozone sonde measurements (black solid line) from Southern Hemisphere Additional OZonesondes (SHADOZ) at stations Kuala Lumpur (3.14°N, 101.69°E), Hanoi (21.02°N, 105.80°E), Costa Rica (9.62°N, -84.25°E) and Hilo (19.72°N, -155.08°E).

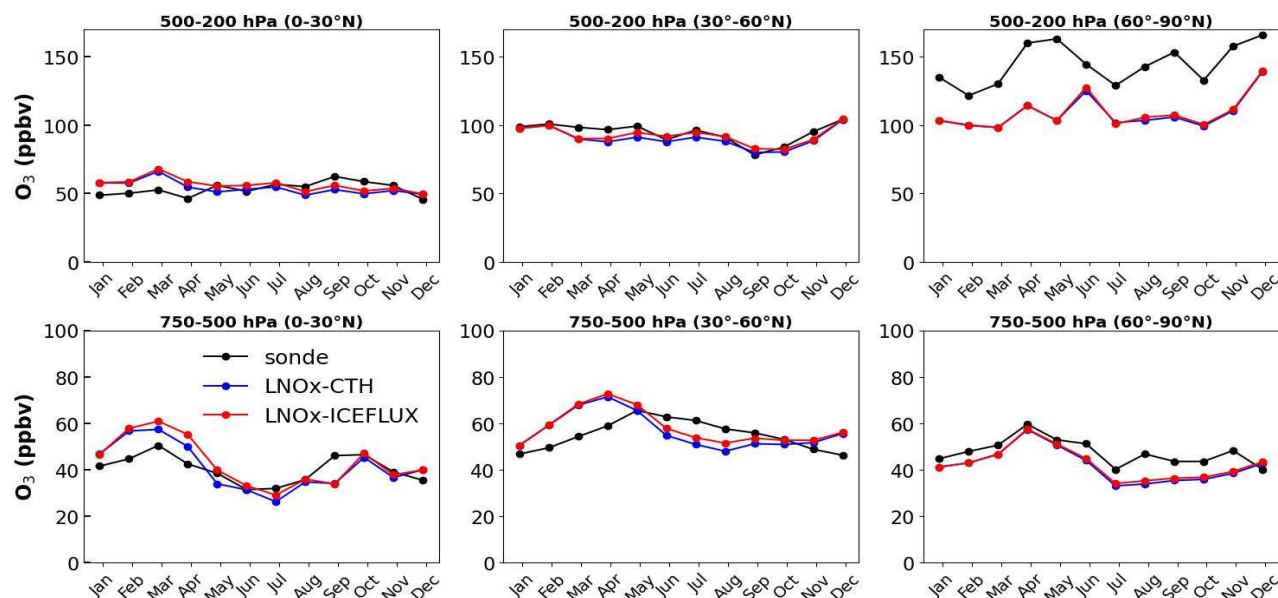

**Figure S2.** Comparison of monthly mean simulated  $O_3$  from LNOx-CTH and LNOx-ICEFLUX with that from WUOZC ozone-sonde, obtained for the year of 2018, averaged over two altitude bands (500–200 hPa and 750–500 hPa) and three latitude bands (0°–30°N, 30°N–60°N and 60°N–90°N).

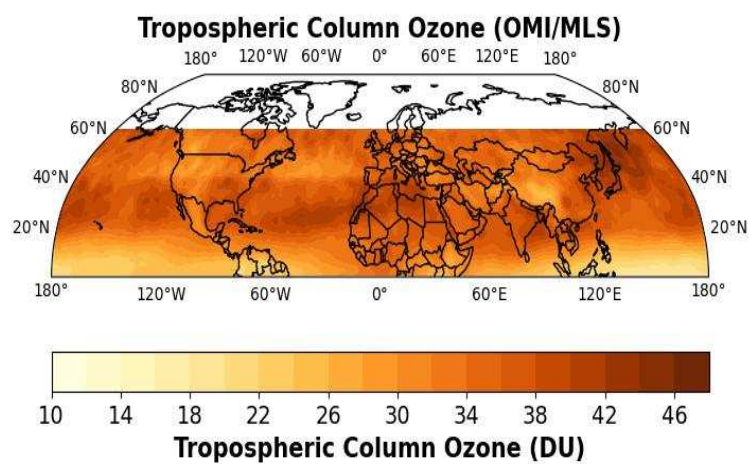

**Figure S3.** Spatial distribution of total column of ozone (TCO) over NH from OMI/MLS.

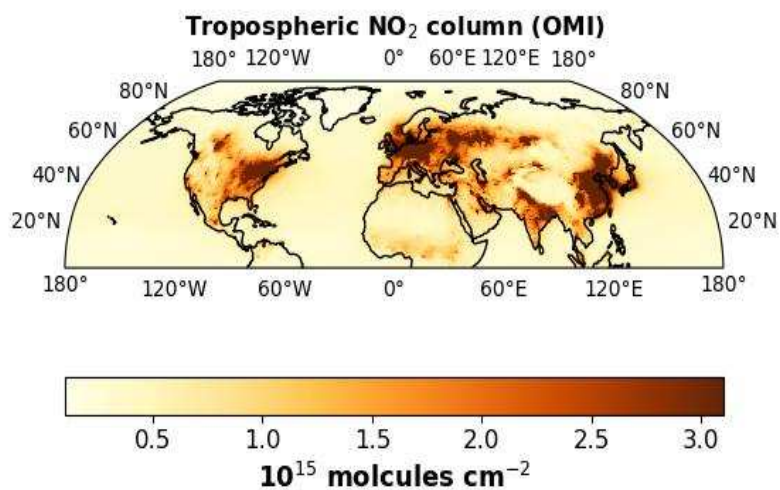

**Figure S4.** Spatial distribution of NO<sub>2</sub> column density over NH from OMI.

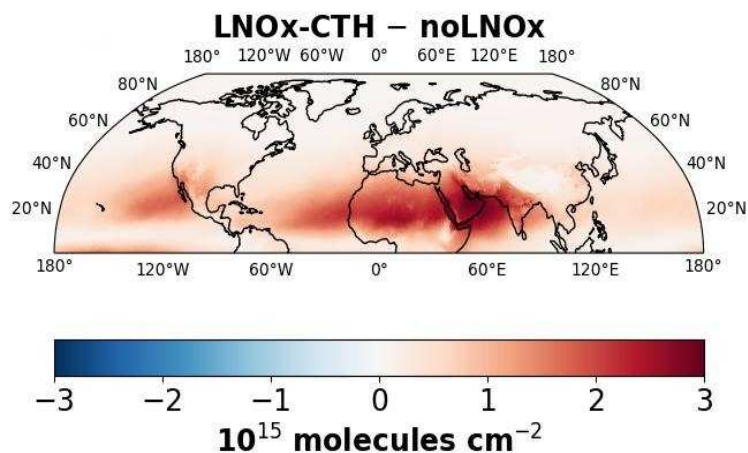

**Figure S5.** Spatial distribution of changes in simulated  $\text{HNO}_3$  column density from experiment LNOx-CTH with respect to noLNOx simulation.

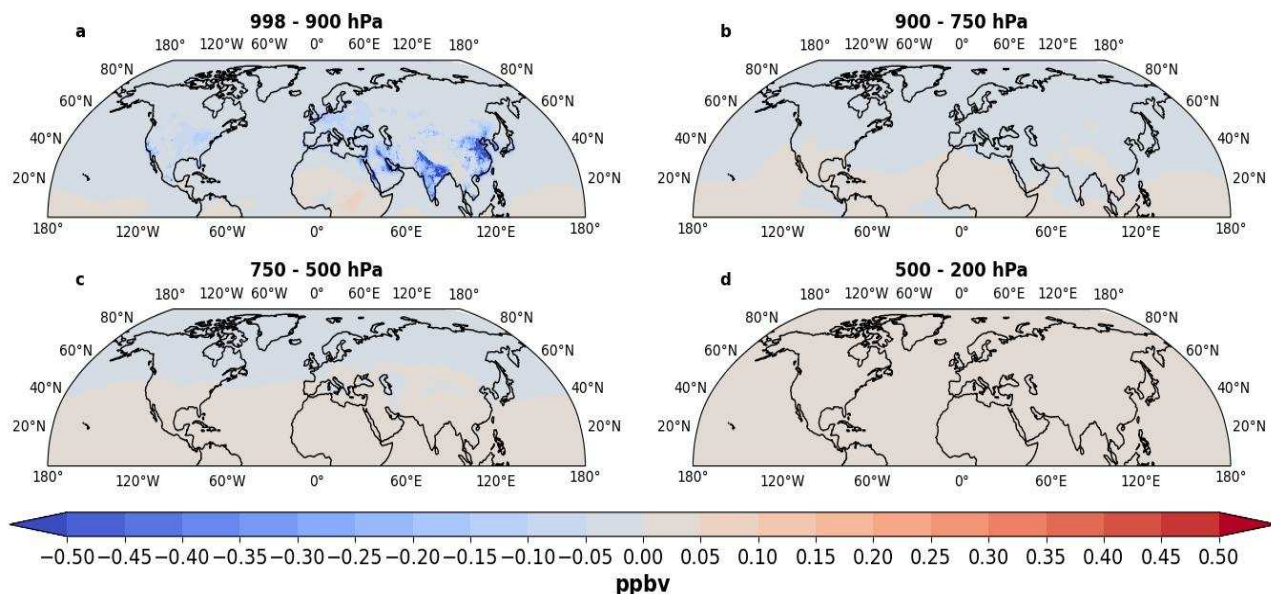

**Figure S6.** Changes in annual mean of  $\text{NO}_2$  mixing ratio from experiment 'LNOx-CTH' with respect to 'noLNOx' at the altitude bands of (a) 998–900 hPa, (b) 900–750 hPa, (c) 750–500 hPa and (d) 500–200 hPa; positive and negative values represent the increase and decrease in the  $\text{NO}_2$  mixing ratio, respectively.



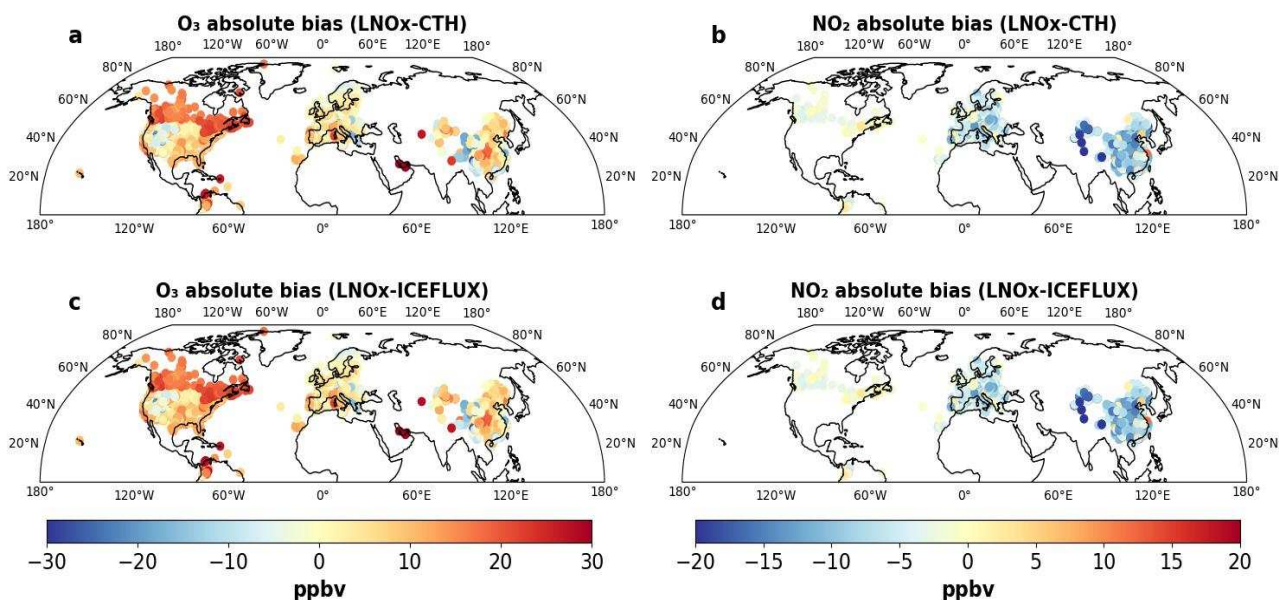

**Figure S7.** Absolute bias in simulated mixing ratio at surface at available stations (a, c) for  $O_3$  from (a) LNOx-CTH and (c) LNOx-ICEFLUX, (b, d) for  $NO_2$  from (b) LNOx-CTH and (d) LNOx-ICEFLUX; positive and negative values of absolute bias represent that simulated  $O_3$  and  $NO_2$  are higher and lower than the measurements, respectively.

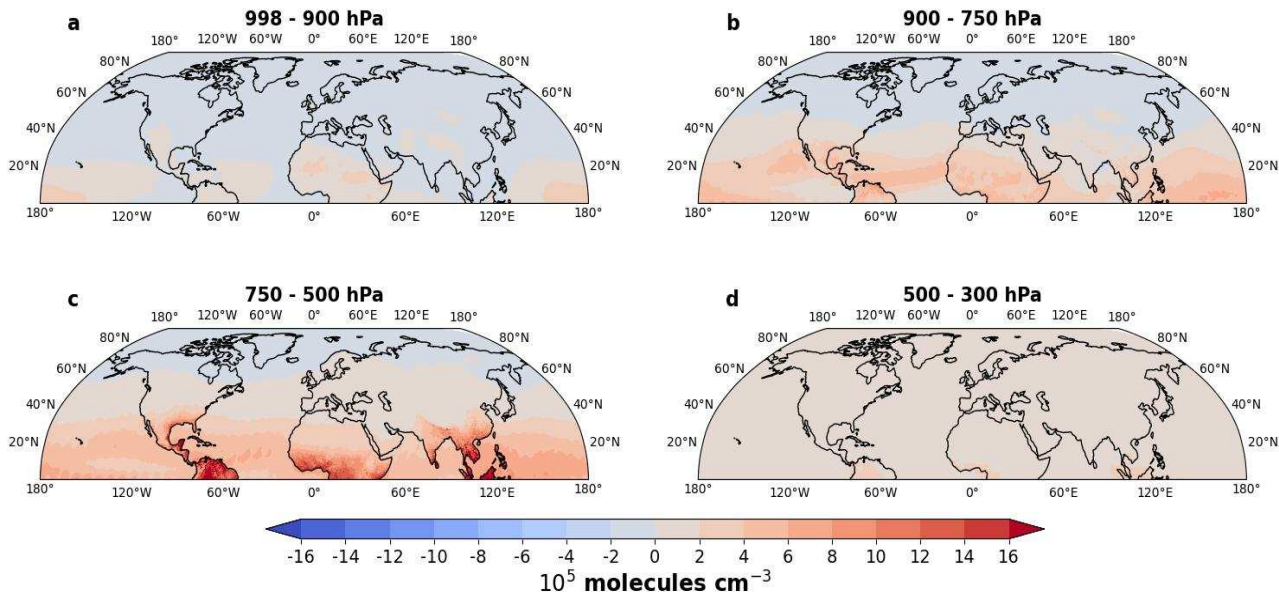

**Figure S8.** Changes in annual mean of OH concentration from experiment 'LNOx-CTH' with respect to 'noLNOx' ( $\Delta OH$ ) at the altitude bands of (a) 998–900 hPa, (b) 900–750 hPa, (c) 750–500 hPa and (d) 500–200 hPa; positive and negative values represent the increase and decrease in the OH concentration, respectively.

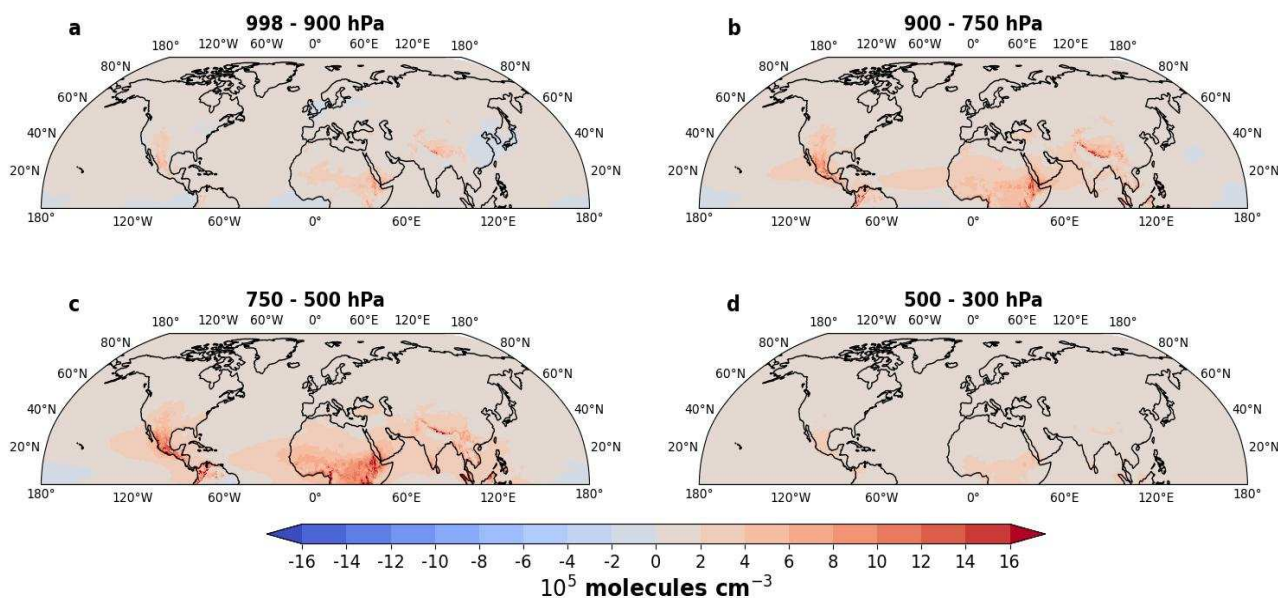

**Figure S9.** Changes in annual mean of OH concentration from experiment 'LNOx-ICEFLUX' with respect to 'LNOx-CTH' at the altitude bands of (a) 998–900 hPa, (b) 900–750 hPa, (c) 750–500 hPa and (d) 500–200 hPa; positive and negative values represent the increase and decrease in the OH concentration, respectively.

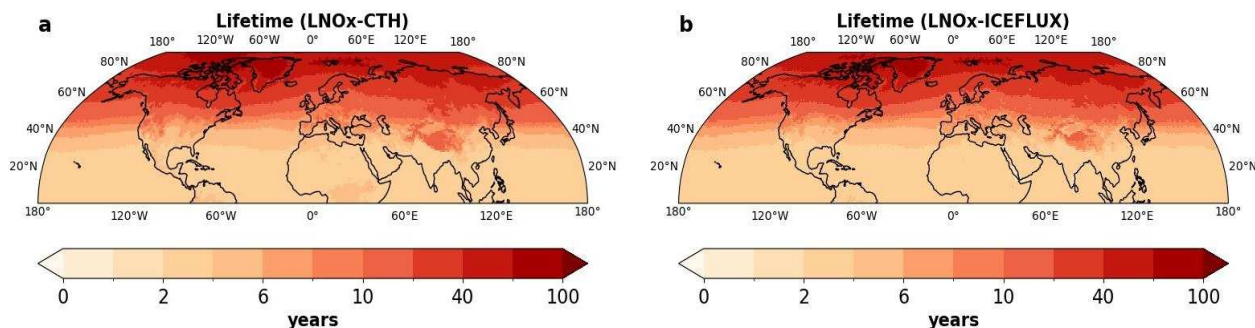

**Figure S10.** Spatial distribution of  $\text{CH}_4$  lifetime over NH estimated from (a) LNOx-CTH and (b) LNOx-ICEFLUX.
